# Supplementary material for: ’Well, it literally stops me from having a life when it’s really bad': a nested qualitative interview study of patient views on the use of self-management treatments for the management of recurrent sinusitis (SNIFS trial)
Source: PubMed Central journal article supplement (PMC5695339; doi:10.1136/bmjopen-2017-017130), 2017-11-03
Supplement: bmjopen-2017-017130supp001.pdf [file bmjopen-2017-017130supp001.pdf]

**SNIFS STUDY**  
**Steam inhalation and Nasal Irrigation For recurrent Sinusitis**  
REC 07/Q1704/69

**Part one: Experiences of Sinusitis**

**1. Could you tell me how severe you feel your sinus problem is to you?**

**Prompts:**

A: What particularly bothers you about your sinus problems?

B: Can you explain to me why this affects you?

**2. Could you tell me how often you become affected by your sinus problem?**

**Prompts:**

A: Are they a problem everyday?

B: When did they first become a problem?

C: Do you have times when your sinus symptoms don't affect you?

*D: Does your sinus problem prevent you from doing anything? (details of this/how does this make you feel).*

**3. Could you tell me how you feel about visiting the doctors about your sinus problems?**

**Prompts:**

A: Have you seen any other healthcare professional about your symptoms? (nurse etc)

B: Do you find it helpful to visit a doctor about your symptoms?

**4. Do you have any ideas about what could be causing your particular sinus problems?**

**Prompts**

A: Do you think it is something to do with how you are made?

B: Do you think it is to do with bacteria and viruses?

## **Part two: Experiences and views of treatments**

### **6. What treatments have you used to treat your sinus problems in the past?**

#### **Prompts:**

A: Can you think of something that worked well?

B: Can you think of something that didn't help at all?

C: *Where did you get the information from for these treatments?*

### **7. Before this study, had you ever heard about using nasal irrigation?**

#### **Prompts**

A: How do you feel about it?

B: Do you think it would help to relieve symptoms?

C: Do you think it might have any side effects?

D: How often do you think it should be used for?

E: How have you found using nasal irrigation?

### **8. Had you heard about using steam inhalation to treat sinusitis before taking part in the study?**

#### **Prompts**

A: How do you feel about it?

B: Do you think it would help to relieve symptoms?

C: Do you think it might have any side effects?

D: How often do you think it should be used for?

E: How have you found using steam?

### **9. Have you ever had antibiotics for your sinus problems?**

#### **Prompts**

A: How did you find using antibiotics?

B: Would you consider using antibiotics again for your sinus problems?

C: Have you heard of any problems with using antibiotics, such as side effects.

D: Have you heard about bacteria becoming resistant to antibiotics?

E: *Where did you hear about these issues (tv, newspapers, GP, others etc)*

#### **Conclusion**

### **10. Are there any other relevant issues we haven't covered that you would like to mention?**

### **11. Are there any questions you that would like to ask me?**
